# Supplementary material for: Evaluation of Pharmacokinetic and Toxicological Parameters of Arnica Tincture after Dermal Application In Vivo
Source: MDPI journal article supplement (doi:10.3390/pharmaceutics14112379), 2022-11-04
Supplement: s1 [file s1]

# Supplementary Materials: Evaluation of Pharmacokinetic and Toxicological Parameters of Arnica Tincture after Dermal Application In Vivo

Franziska M. Jürgens, Sara M. Robledo and Thomas J. Schmidt

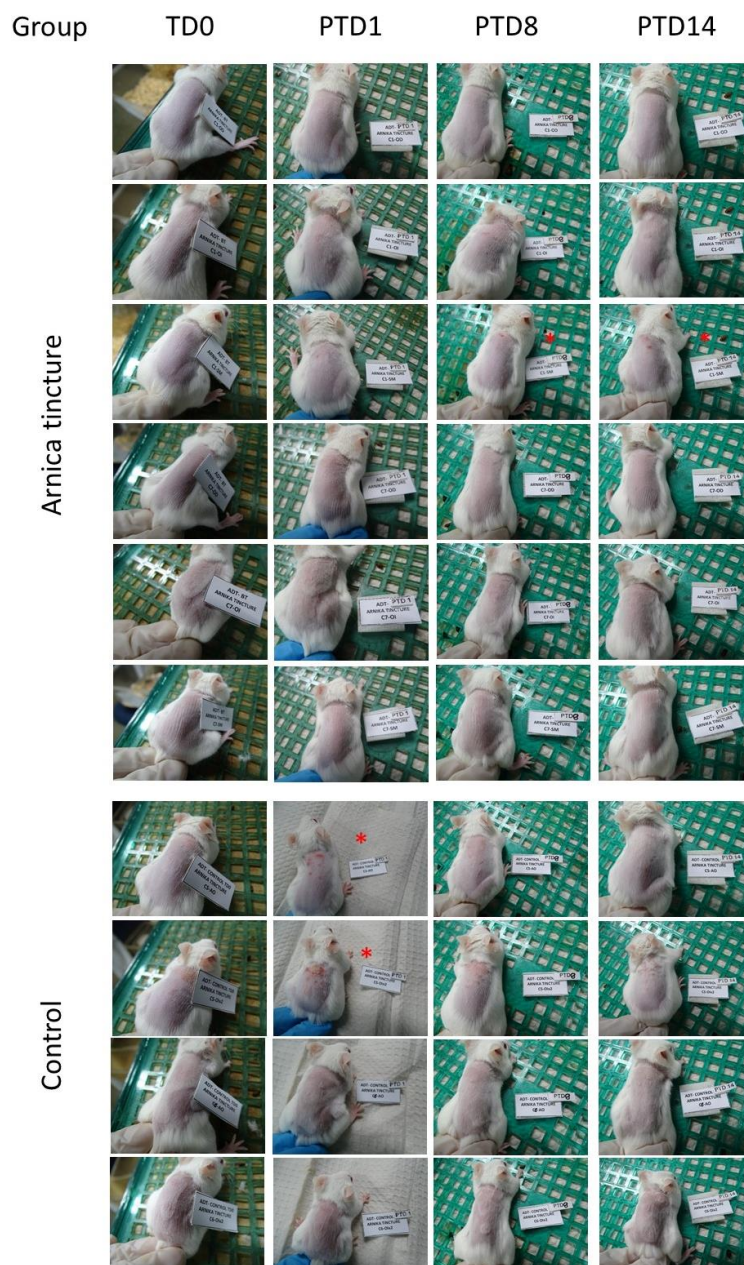

**Figure S1.** Appearance of skin area exposed to the tincture in comparison to untreated mice (acute dermal toxicity study). \*Mice with erythematous lesions.

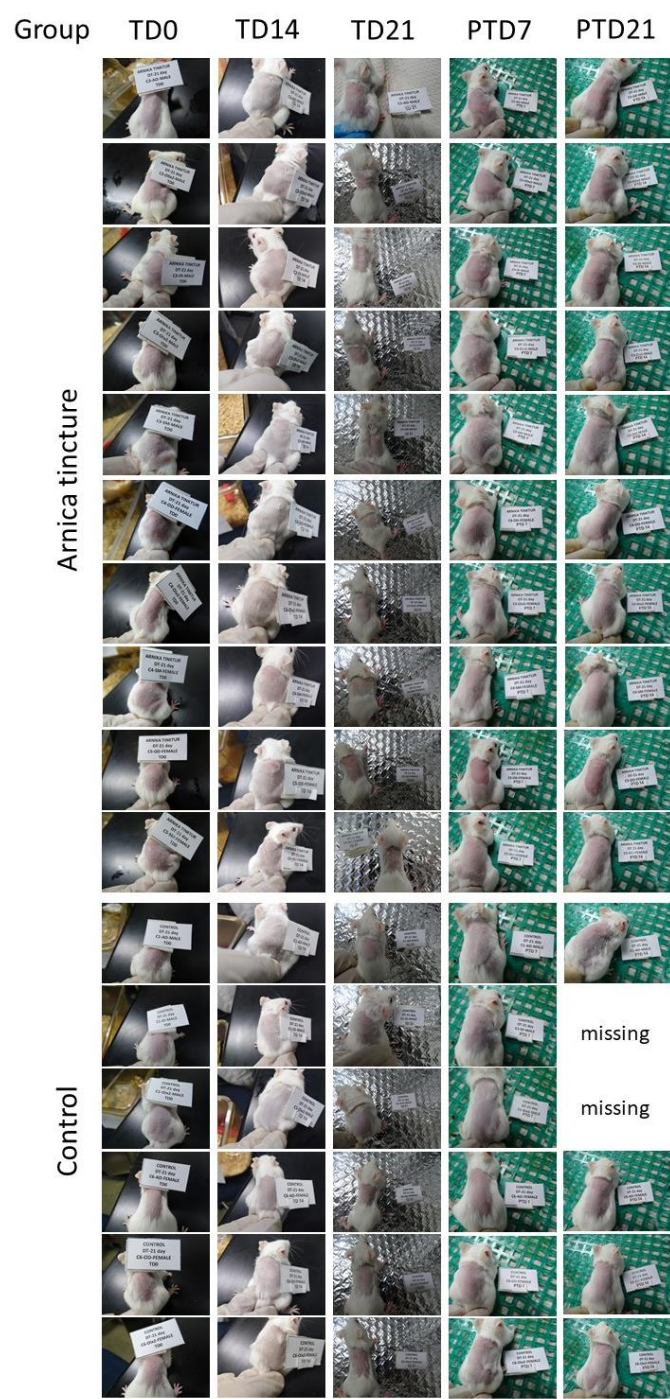

**Figure S2.** Appearance of skin area exposed to the tincture in comparison to untreated mice (repeated dose dermal toxicity study).
